# Supplementary material for: Ischemic Cardiomyopathy versus Non-Ischemic Dilated Cardiomyopathy in Patients with Reduced Ejection Fraction— Clinical Characteristics and Prognosis Depending on Heart Failure Etiology (Data from European Society of Cardiology Heart Failure Registries)
Source: MDPI journal article supplement (doi:10.3390/biology11020341), 2022-02-21
Supplement: s1 [file s1]

**Figure S1.** Kaplan–Meier curves for the primary endpoint\* of patients with the ICM and NIDCM etiology of HF after censoring for in-hospital events.

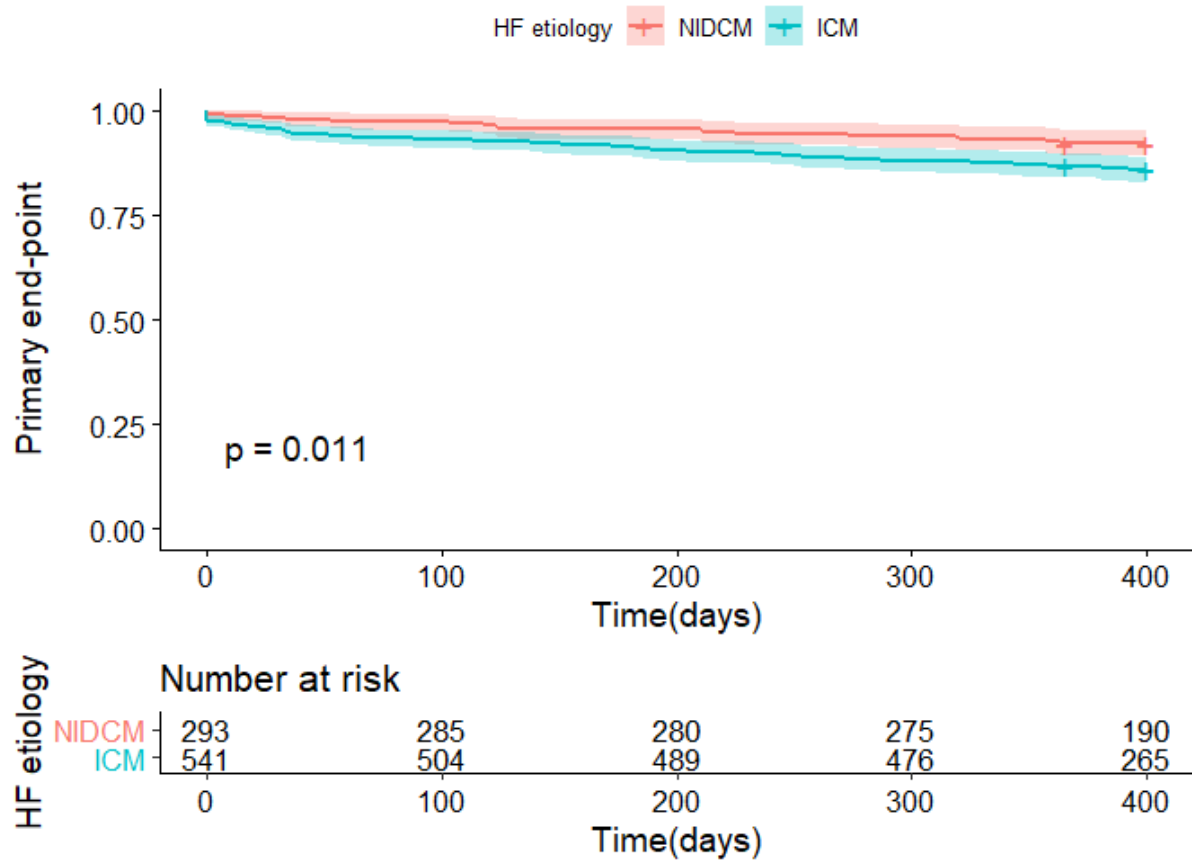

ICM – ischemic cardiomyopathy; NIDCM – non-ischemic dilated cardiomyopathy;  
 \*primary endpoint - all-cause death at one year

**Figure S2.** Kaplan–Meier curves for the secondary endpoint\* of patients with the ICM and NIDCM etiology of HF after censoring for in-hospital events.

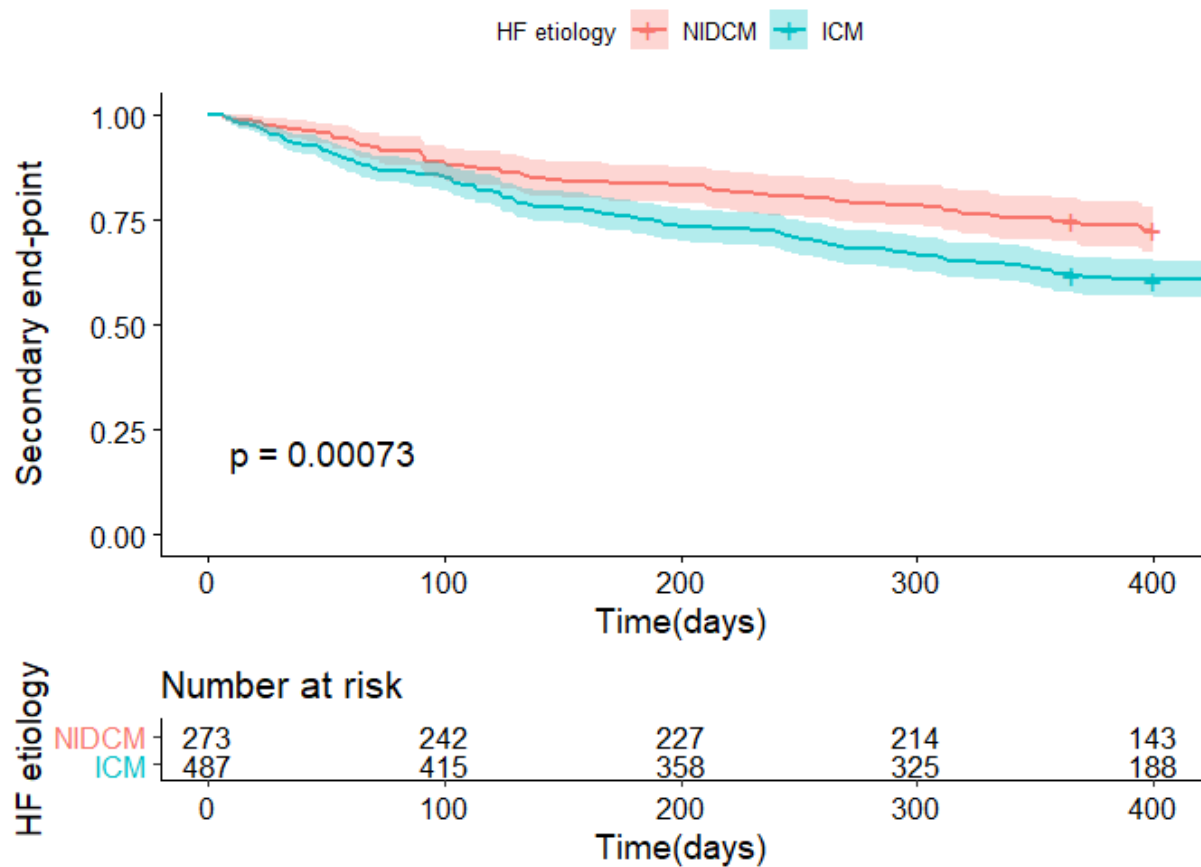

ICM – ischemic cardiomyopathy; NIDCM – non-ischemic dilated cardiomyopathy;

\*secondary endpoint - composite of all-cause death and hospitalization for HF worsening at one year)
